1 **Title:** Fungi are more dispersal-limited than bacteria among flowers

2

3 **Authors:**

4 Rachel Vannette\* Griffin Hall, Ivan Munkres

5

6 Department of Entomology and Nematology, University of California Davis

7

8 \*Corresponding author address and contact information: Department of Entomology and

9 Nematology, University of California Davis. Phone 530-752-3379, email:

10 [rlvannette@ucdavis.edu](mailto:rlvannette@ucdavis.edu)

11

12 **ORCID ID:** <https://orcid.org/0000-0002-0447-3468>

13

14 **Keywords:** nectar yeast, plant-microbe, nectar sugar composition, microbial ecology, plant-  
15 pollinator interactions

16

17 **Author contributions:** RLV conceived of study, performed fieldwork, performed statistical  
18 analyses, and wrote the manuscript. GH performed field and microbial labwork; IM analyzed  
19 and processed nectar sugar samples and MALDI-TOF identifications. All authors contributed to  
20 revisions and gave final approval for publication.

21

22 **Abstract:**

23 Dispersal, particularly variation in dispersal ability among taxa, affects community assembly in  
24 individual communities and biodiversity maintenance within metacommunities. Although fungi  
25 and bacteria frequently coexist, their relative dispersal abilities are poorly understood. Here, we  
26 compare the incidence and abundance of culturable flower-inhabiting bacteria and fungi among  
27 individual flowers. Using collections that span two coflowering communities across two years,  
28 we assess viable bacterial and fungal incidence and abundance within individual flower samples,  
29 and examine patterns across plant species that differ in flower traits. Our results demonstrate  
30 that bacteria can be detected in more flowers and in greater numerical abundance than fungi,  
31 particularly in flowers with more exposed corollas. For fungi, however, flowers with long  
32 corollas were equally likely as exposed flowers to contain cells, and hosted higher numbers of  
33 fungal cells, primarily yeasts. Across all flowers, bacteria and fungal incidence was positively  
34 related, but within flowers containing microbes, bacterial and fungal incidence was negatively  
35 related, suggesting shared dispersal routes but competition among microbes within flowers. The  
36 difference in dispersal abilities of bacteria and fungi identified here may have broad relevance  
37 for community assembly of microbes and plant-pollinator interactions.

## 38 **Introduction**

39 All organisms exhibit some degree of dispersal limitation. Variation in dispersal ability among  
40 species can have consequences for the composition and function of individual communities and  
41 biodiversity maintenance within metacommunities (Leibold et al. 2004). Dispersal limitation is  
42 well-documented for macro-organisms, and microbial taxa can also be dispersal limited (Peay et  
43 al. 2012). Despite the fact that bacteria and fungi often co-occur within habitats, few studies have  
44 examined their relative dispersal abilities. In some cases, bacteria and fungi can share modes of  
45 long-distance or even short-distance dispersal (Barberán et al. 2015). However, comparisons in  
46 dispersal ability between bacteria and fungi are rare and limit the ability to predict the relative  
47 importance of dispersal for these groups of organisms, or consequences for community patterns.  
48 For example, if bacteria and fungi are similarly dispersal limited, interactions within local  
49 communities may be most important in determining species composition, but if dispersal  
50 limitation differs between bacteria and fungi, metacommunity dynamics may be more important.  
51 In the second case, if bacteria are better dispersers but fungi are more dominant competitors,  
52 competition-colonization dynamics could be predicted. However, processes underlying microbial  
53 community assembly and dynamics likely differ from those structuring communities of  
54 macroorganisms (Koskella et al. 2017).

55  
56 Bacteria and fungi often occur in nectar of flowers (Herrera et al. 2009, Fridman et al. 2012).  
57 Nectar-inhabiting microbial communities are ideal for examining dispersal limitation for a few  
58 reasons. First, communities in nectar undergo primary succession. Few culturable microbes are  
59 found in nectar of newly opened flowers that have not received visitation by animals (Vannette  
60 and Fukami 2017, von Arx et al. 2019), but flower visitors introduce bacteria and fungi that  
61 successfully colonize floral nectar (Lachance et al. 2001, Herrera et al. 2008). Second, the  
62 majority of bacteria and fungi that survive and thrive in floral nectar are largely culturable  
63 (Morris et al. 2020)—shotgun sequencing of nectar microbial communities reveal qualitatively  
64 similar taxonomic composition to culture-based analyses. Third, the bacteria and fungi that grow  
65 in nectar are a small subset of the microbial communities introduced to nectar (Herrera et al.  
66 2010, Belisle et al. 2012, Alvarez-Pérez and Herrera 2013), exhibit traits that may enhance  
67 fitness in nectar environments (Álvarez-Pérez et al. 2012, Pozo et al. 2012a, Dhami et al. 2016),  
68 and predominately depend on phoresy via flower visitors (Brysch-Herzberg 2004, Vannette and

69 Fukami 2017, Morris et al. 2020). Finally, laboratory experiments and field observations suggest  
70 that inhibitory priority effects influence community structure in floral nectar (Tucker and Fukami  
71 2014, Toju et al. 2018). However, positive interactions among nectar-inhabiting taxa have been  
72 suggested (Alvarez-Pérez and Herrera 2013), so the relative influence of dispersal and species  
73 interactions (including competition) on nectar microbe metacommunities are not clear.  
74 Elucidating patterns of bacteria and fungi dispersal limitation in nectar would shed light on  
75 mechanisms underlying their community assembly, interactions between these groups in nectar,  
76 and their ecological relevance for plants and floral visitors.

77  
78 Here, we test the hypothesis that bacteria and fungi differ in dispersal limitation among  
79 individual flowers in two coflowering communities. We examined bacterial and fungal  
80 occupancy (incidence) and abundance in individual nectar samples of more than 1800 flowers,  
81 spanning 43 species of plants at two sites to examine 1) do bacterial or fungal incidence and  
82 abundance vary among plant species? 2) Is observed variation associated with floral traits? 3) Is  
83 variation in nectar volume and sugar concentration and composition associated with variation in  
84 fungal or bacterial abundance?

85  
86 We found that bacteria occupy a higher proportion of flowers than do fungi, and flowers with  
87 more accessible morphology (e.g. exposed nectary) more frequently contain detectable microbes.  
88 Moreover, abundant fungal populations are mainly restricted to flowers with long corollas. The  
89 incidence of both bacteria and fungi were associated with lower nectar volumes, indicating the  
90 importance of dispersal agents for microbial inoculation. However, in flowers containing  
91 microbes, bacterial and fungal abundance were positively associated with nectar volume,  
92 suggesting that time since previous visitation affects microbial abundance in nectar. Patterns of  
93 co-occurrence in flowers suggest that bacteria and fungi shared dispersal agents, but negative  
94 associations within individual flowers also suggest competitive interactions within nectar. These  
95 results suggest not only that bacteria and fungi differ in dispersal ability among flowers, but  
96 suggest the possibility that competition-colonization dynamics could be important in community  
97 membership and effects on plant-pollinator interactions.

98  
99 **Materials and methods**

100 *Field sites and flower sampling*

101 During the peak flowering seasons of 2016 and 2017, standing crop floral nectar was sampled  
102 from two sites in northern California: Stebbins Cold Canyon Reserve (Stebbins) in Winters, CA  
103 and at flowering plots maintained at the Laidlaw Honey Bee Facility (Bee Biology) in Davis,  
104 CA. The sites are approximately 18 miles apart, so are unlikely to be linked by pollinator  
105 dispersal, and differ in pollinator species composition and anthropogenic influence, but share a  
106 subset of plant species.

107  
108 Between late February and early July, flowers were sampled every two-four weeks from  
109 available plant species, with approximately 10 flowers of each plant collected per week  
110 (collections were limited by floral availability and reserve collection restrictions to protect plant  
111 populations). When possible, flowers were sampled from multiple individuals and sub-  
112 populations or plots (Supplementary Table S1). Care was taken to sample flowers that had been  
113 open at least one day if possible, to allow the opportunity for floral visitation and microbial  
114 immigration to flowers. Individual inflorescences were collected, placed upright in humidified  
115 boxes and kept cool until extraction and plating, no more than 5 hours later. In the lab, flowers  
116 were destructively sampled. Nectar was collected using 10  $\mu$ l microcapillary tubes, and volume  
117 quantified. Nectar was diluted in 30  $\mu$ l of sterile water (D0), then diluted 10 and 100 fold (D1  
118 and D2 respectively) in sterile phosphate-buffered saline. To assess fungal and bacterial  
119 abundance, 50  $\mu$ l of the 10 fold dilution (containing 5  $\mu$ l of D0) and 50  $\mu$ l of the 100 fold  
120 dilution (containing 0.5  $\mu$ l of D0) were plated on yeast media agar (YMA) containing  
121 chloramphenicol and Reasoner's agar containing cycloheximide (R2A Oxoid formula with 20%  
122 sucrose), respectively. All samples were plated the day of collection. For convenience, we refer  
123 to the total number of colonies on YMA as "fungi" and colonies on R2A as "bacteria"  
124 throughout the manuscript although some colonies on each media type may be comprised by  
125 microbes resistant to the antimicrobial compounds used here (e.g. bacteria resistant to  
126 chloramphenicol (Dhami et al. 2018)). The threshold for detection was approximately 8 live cells  
127 for YMA media and 60 cells for R2A media in the original nectar sample. Negative controls  
128 were included and plated to detect potential contamination and samples discarded if  
129 contamination was detected (detected on 1 date; these samples were removed from the analysis).  
130 Agar plates were incubated at 28°C and colony-forming units (CFUs) counted after 48-72 hours.

131 The total number of CFUs and CFU density for each nectar sample was calculated based on  
132 dilutions and original sample volume. Over the course of the study, 1 825 nectar samples were  
133 collected and plated on two media types. In 2016, representative colonies were picked  
134 haphazardly from plates collected over the entire season including all sites and plant species and  
135 frozen in glycerol.

136

137 A subset of microbial strains from glycerol stocks were identified using MALDI-TOF and  
138 spectra were compared to Bruker Bacteria and Eukaryote libraries and a custom in-house  
139 database curated from previously identified microbial isolates from nectar (Supplementary  
140 Methods 1).

141

#### 142 *Floral traits*

143 To examine if bacterial or fungal abundance differed between plant species whose flowers  
144 differed in morphology (likely influencing dispersal rate or frequency), we classified plant  
145 species based on corolla length which often limits accessibility of nectar to floral visitors  
146 (Kingston and Mc Quillan 2000, Lara and Ornelas 2001). Categories included “short” (1-5 mm),  
147 “mid” (5-15 mm), or “long” (15+ mm) corolla based on corolla tube length. Corolla color (red,  
148 blue/purple, white/light, yellow) was also recorded.

149

#### 150 *Sugar analysis*

151 To examine if bacterial or fungal abundance was associated with nectar sugar concentration or  
152 composition, we quantified sugars in nectar samples. Only samples collected in 2016 were  
153 analyzed (N=764), but represented both sites and one entire flowering season. For each sample, 5  
154  $\mu$ l of diluted nectar (D0) was added to 45  $\mu$ l of 50:50 Acetonitrile: water containing a 0.5 mg/ml  
155 of maltose as an internal standard. Each 2  $\mu$ l injection was separated using a Thermo (Dionex)  
156 binary pump HPLC system on a Thermo Accucore 150-Amide-HILIC column (2.6 $\mu$ m; 50 x  
157 2.1mm I.D) at 0.17 mL/min using a 5 minute gradient starting at 80:20 Acetonitrile:water,  
158 decreasing linearly to 50:50, followed by a 10 minute equilibration at initial conditions.  
159 Saccharides were quantified using charged aerosol detection. Peak areas were quantified for  
160 mono- and disaccharides, and a series of external standards was used to calculate sugar  
161 concentration in each sample.

162

### 163 *Statistical analysis*

164 To determine if bacteria and fungi differ in incidence in floral nectar, across years or between  
165 sites, or by plant species, we used a logistic regression implemented using ‘glm’, using microbe  
166 (bacteria or fungi), site, year and plant species, and their two-way interactions as predictors.  
167 Significance was assessed using likelihood ratio tests. To determine if bacteria and fungi differ in  
168 abundance in floral nectar across years or sites, or by plant species, we used a linear regression  
169 implemented using ‘lm’, with  $\log_{10}(\text{microbe CFUs}+1)$  as a response and microbe (bacteria or  
170 fungi), site, year and plant species, and their two-way interactions as predictors. Interactions  
171 were dropped from the model if not significant. Significance was assessed using F-tests. To  
172 compare if floral traits (corolla length or flower color) was associated with bacterial or fungal  
173 presence or abundance, we used logistic regression and linear regression as above, but replaced  
174 plant species with color and nectary location (single model), and included all two-way  
175 interactions. To examine the relationship between bacterial and fungal incidence in individual  
176 nectar samples, we used Pearson correlations and repeated this analysis including only flowers  
177 that contained detectable microbes. Within flowers that contained microbes, we also assessed if  
178 bacterial and fungal abundance were associated using Pearson correlations of log-transformed  
179 CFU counts. To examine if nectar characteristics were associated with microbial incidence or  
180 abundance, we used linear regression with  $\log_{10}(\text{nectar volume}(\mu\text{l})+0.1)$  as the response variable  
181 and plant species, microbial incidence and abundance, and site as predictors. This analysis was  
182 repeated for total sugar concentration and the proportion of nectar sugars comprised by  
183 monosaccharides but the HPLC run was included as a random effect and nectar volume was  
184 included as a covariate. Mixed effects models were performed using lme4 (Bates et al. 2011).  
185 Significance of factors was assessed using F-tests and of continuous variables using t-tests to  
186 examine directionality of effects. All analyses were conducted using RStudio and R v. 3.6.3.

187

## 188 **Results**

### 189 *Patterns of bacterial and fungal incidence*

190 Detectable colonies on R2A media (hereafter ‘bacteria’) were isolated from nectar more  
191 frequently than were colonies on YMA (hereafter, ‘fungi’): bacteria were detected in 49% of  
192 samples but fungi in only 20% of samples (microbe LRT=21.07,  $P<0.001$ , Fig. 1). Microbial

193 incidence differed between geographic sites, microbes were found in nectar more frequently at  
194 Bee Biology than at Stebbins Reserve (54% vs 46%, LRT = 14.5  $P < 0.001$ , Supplementary Fig.  
195 S1a). Microbial incidence differed between years (LRT= 19.6,  $P < 0.001$ ) and among plant  
196 species (LRT = 293.8,  $P < 0.001$ ). Bacteria and fungi differed in patterns of incidence among sites  
197 and plant species. In contrast to bacteria, fungi were more likely to occur in flowers at Stebbins  
198 than at Bee Biology (microbe x site LRT= 4.3,  $P = 0.03$ ), and differed in patterns of incidence  
199 among plant species compared to bacteria (microbe x plant LRT=81.1,  $P < 0.001$ ).

200

#### 201 *Patterns of bacterial and fungal abundance in nectar*

202 Within flowers that contained microbes, bacteria were more abundant than fungi, averaging at  
203 least an order of magnitude greater than fungal CFUs (microbe  $F_{1,1904} = 112.8$ ,  $P < 0.001$ ) despite a  
204 higher detection threshold for bacteria. Microbial abundance was greater at Stebbins Reserve  
205 than at Bee Biology for both bacteria and fungi (site  $F_{1,1904} = 5.6$ ,  $P = 0.02$ , Supplementary Fig.  
206 S1b). Microbial abundance differed between years ( $F_{1,1904} = 4.2$ ,  $P = 0.04$ ). Interactions between  
207 microbial identity (bacteria vs fungi) and site or year were not significant ( $P > 0.10$ ) so were  
208 dropped from the model. Microbial abundance varied widely among plant species ( $F_{41,1904} = 3.6$ ,  
209  $P < 0.001$ ) and differed depending on whether bacteria or yeasts were considered (microbe x plant  
210 species  $F_{41,1904} = 3.8$ ,  $P < 0.001$ ).

211

#### 212 *Floral traits are associated with variation in microbial incidence and abundance*

213 Plant species differed in microbial incidence in floral nectar (Figure 1) ranging from an average  
214 of 20% to 100% of sampled flowers containing bacteria. Floral traits were associated with some  
215 of this variation (Fig. 2A,B). Microbes were more frequently detected in nectar of plant species  
216 with an exposed nectary than those with short, mid or long corollas (Fig. 2; all flowers  
217 LRT=20.3,  $P < 0.001$ ), however, bacteria and fungi differed in patterns of occurrence (microbe x  
218 nectary location LRT=14.1,  $P = 0.003$ ). In other words, fungi were more frequently isolated from  
219 plant species with exposed nectaries and with long corollas (Fig. 2), while bacterial incidence  
220 was less variable among plant species with varying corolla length. Microbial incidence also  
221 differed among flowers depending on color (LRT=62.1,  $P < 0.001$ ), and bacteria and fungi  
222 differed in patterns of incidence among colors in some cases (microbe x color LRT 11.5,  
223  $P = 0.009$ ). In particular, bacterial incidence was greater in red flowers than blue or light flowers,



224 whereas fungal abundance was not (Fig. 2). Microbial abundance also varied to some degree  
225 with flower traits, although bacteria and fungi differed in their responses. Specifically, fungi  
226 were most abundant in flowers with long corollas (Fig. 2 D microbe x nectary location  $F_{3,1980}$   
227  $=8.5$ ,  $P<0.001$ ) compared to other flower morphologies, whereas bacterial abundance did not  
228 vary with nectary location. Microbial abundance did not vary significantly among flowers  
229 depending on floral color (color  $F_{3,1980}=1.85$ ,  $P=0.13$ ).

230

### 231 *Patterns of co-occurrence between bacteria and fungi*

232 Among all individual flowers, bacterial and fungal incidence in nectar were positively correlated  
233 (Pearson's  $r=0.23$ ;  $P=0.001$ ). However, when flowers containing any microbial colonies were  
234 considered, bacterial and fungal incidence and abundance were negatively correlated (Incidence  
235 Pearson's  $r=-0.44$ ;  $P<0.001$ ; Abundance Pearson's  $r=-0.10$ ;  $P<0.001$ ). Notably, this relationship  
236 between bacterial and fungal abundance is variable among plant species, with most species  
237 displaying a negative or nonsignificant association, but some plant species showing a positive  
238 association (Supplementary Fig. 2).

239

### 240 *Microbial associations with nectar volume and sugar*

241 Standing nectar volume varied among plant species ( $F_{41,1768}=10.16$ ,  $P<0.001$ ), and was  
242 associated with microbial incidence and abundance, but in the opposite direction. Flowers  
243 containing no microbes had more nectar than flowers containing microbes (Bacterial presence  
244  $t=-3.19$ ,  $P=0.001$ ; Fungal presence  $t=-2.12$ ,  $P=0.03$ ). In other words, nectar volume was lower  
245 when samples contained fungi or bacteria. However, microbial abundance in nectar was  
246 positively associated with nectar volume for both bacteria ( $t=4.01$ ,  $P<0.001$ ) and fungi ( $t=2.79$ ,  
247  $P=0.005$ ). In addition, nectar sugar parameters varied significantly among plant species (amount  
248  $F_{14,251}=18.94$ ,  $P<0.001$ ; concentration  $F_{14,251}=6.9$ ,  $P<0.001$ ; proportion monosaccharides  
249  $F_{14,251}=8.9$ ,  $P<0.001$ ) and with nectar volume (amount  $t=21.1$ ,  $P<0.001$ ; concentration  $t=-1.46$ ,  
250  $P=0.14$ ; proportion monosaccharides  $t=-4.5$ ,  $P<0.001$ ). Nectar sugar parameters were also  
251 significantly, albeit weakly, associated with microbial abundance in nectar. Sugar amount and  
252 concentration were negatively associated with fungal abundance in floral nectar (amount  $t=-2.3$ ,  
253  $P=0.02$ ; concentration  $t=-1.9$ ,  $P=0.05$ ), whereas bacterial abundance was less strongly associated  
254 with variation in nectar sugars (amount  $t=-1.2$ ,  $P=0.22$ ; concentration  $t=-0.62$ ,  $P=0.53$ ). The

255 proportion of sugars comprised of monosaccharides was weakly positively associated with  
256 bacterial abundance in nectar (composition  $t=1.98$ ,  $P=0.04$ ) and fungal abundance was positively  
257 but not significantly associated with proportion of sugars comprised by monosaccharides  
258 ( $t=0.90$ ;  $P=0.36$ ).

259

#### 260 *Identity of culturable microbes*

261 Bacteria from the genera *Acinetobacter*, *Bacillus*, *Pseudomonas*, and *Erwinia* were the most  
262 commonly identified from floral nectar (Supplementary Table 2). Yeasts from the genus  
263 *Metschnikowia* and *Candida* were the most commonly identified fungi (Supplementary Table 2).  
264 Filamentous fungi were not identified using MALDI.

265

#### 266 **Discussion**

267 The patterns of bacterial and fungal occurrence in floral nectar observed here suggest that  
268 bacteria are less dispersal limited than are fungi among flowers. Greater dispersal ability of  
269 bacteria could be due to a few distinct factors. It may be that bacteria are able to use a great  
270 number of dispersal modes (e.g. wind, water, greater diversity of insects) compared to fungi, or  
271 that bacterial propagules are more easily dispersed or less susceptible to mortality during  
272 dispersal than fungal cells or spores. One alternative interpretation of the observed pattern is that  
273 fungi are equally able to disperse but less able to survive in floral nectar (immigration vs  
274 establishment (Cadotte 2006). Our survey data cannot directly address this possibility. All CFUs  
275 detected represent viable cells, and include species considered ‘allochthonous’ and  
276 ‘autochthonous’ to nectar (Brysch-Herzberg 2004)--species that are observed to attain high  
277 abundance and those that are only incidentally reported. Additional experiments would be  
278 required to compare if immigration vs establishment differed for multiple species of bacteria and  
279 fungi to assess which components of dispersal processes differ for bacteria and fungi. This could  
280 inform if bacteria and fungi differ in dispersal mode, viability during dispersal, or survival and  
281 establishment once reaching a new patch.

282

283 Two lines of evidence from our study support a primary role for floral visitors in dispersal of  
284 both culturable bacteria and fungi in floral nectar. First, the incidence of bacteria and fungi were  
285 positively correlated across individual flowers, suggesting shared vectors. Second, flowers

286 containing microbes had lower nectar volume compared to uncolonized flowers, consistent with  
287 a role of nectar consumers in dispersal of both bacteria and fungi. However, fungi are either  
288 more variable in establishment success, or less able to successfully disperse using these routes,  
289 resulting in their lower incidence overall (Fig 1). In particular, fungi (but not bacteria) are more  
290 likely to occur in and become abundant in flowers with long corollas (Fig 2). Notably, common  
291 nectar-inhabiting yeasts (*Metschnikowia reukaufii*, Supplementary Table 1) were frequently  
292 detected in flowers with long corollas, but not in exposed or short-corolla flowers. This pattern  
293 of fungal occurrence is consistent with a few non-exclusive hypotheses: 1) visitors of flowers  
294 with long corollas are primary vectors of fungi (yeasts) to flowers; and/or 2) fungi (yeasts)  
295 establish and grow most successfully in the microenvironments within long corollas, possibly  
296 explained by different nectar chemistry, reduced desiccation probability, or reduced UV  
297 exposure in plant species with long corollas (Plowright 1987). Our observations, together with  
298 previous work in bumble bees (Brysch-Herzberg 2004, Pozo et al. 2012b) and hummingbirds  
299 (Belisle et al. 2011, Lee et al. 2019) suggest the first hypothesis is likely, but do not rule out the  
300 second hypothesis. Specifically, flowers of plant species primarily pollinated by bumblebees or  
301 hummingbirds (e.g. *Delphinium* spp, *Castilleja* spp, and *Penstemon* spp, *Mimulus*(*Diplacus*))  
302 contained the highest average densities of fungi (nearly all yeasts, Personal observation) (Figs 1-  
303 2, Supplementary Table 2). Exceptions to this pattern were also observed, however. For example,  
304 other studies have found the nectar of *Epilobium canum* to be abundantly colonized by yeasts  
305 (Morris et al. 2020), but fungi were infrequently detected in this species in this study, which we  
306 hypothesize is due to low levels of hummingbird visitation at this site during the sampling  
307 period. The nectar of the morning glory *Calystegia occidentalis* contained abundant yeast  
308 populations, but was frequently visited by solitary bees or flower beetles, which can also vector  
309 floral yeasts (Lachance et al. 2001). These data suggest that yeast may be more common and  
310 have stronger effects on plant-pollinator interactions in flowers with long corollas and in plant  
311 species that are frequently visited with effective yeast vectors. In contrast, bacterial are present  
312 across a greater range of plant species.

313  
314 While dispersal is likely a key factor, other plant species suggest that environmental filtering can  
315 also shape nectar microbial communities. For example, nearly all flowers of *Toxicoscordion*  
316 *fremontii*, which produces very viscous nectar that is exposed on petal surfaces, contained

317 culturable microbes, but mostly at low densities. In *T. fremontii*, we hypothesize that abiotic  
318 stressors (desiccation, extreme osmotic conditions or UV), nectar characteristics (secondary  
319 metabolites or other traits) could limit microbial survival, while infrequent microbial dispersal by  
320 a limited visitor community (we only observed visitation by ants) may also limit immigration to  
321 floral nectar.

322  
323 In addition, correlations between bacterial and fungal incidence and abundance suggest roles of  
324 both dispersal and competition in shaping microbial communities in nectar. Positive associations  
325 between bacteria and fungi across flowers overall suggest shared dispersal vectors (Alvarez-  
326 Pérez and Herrera 2013). Once flowers have been visited, however, bacterial and fungal  
327 incidence and abundance were negatively associated at the level of individual flowers and often  
328 within individual plant species (Supplementary Figure S2). Although we cannot rule out the  
329 possibility that nectar conditions in some flowers may be more hospitable to yeasts compared to  
330 bacteria, the evidence presented here is consistent with the hypothesis that competitive  
331 interactions are important in nectar microbial communities, and suggest that priority effects  
332 among nectar microbes may influence microbial diversity within individual flowers (Tucker and  
333 Fukami 2014, Mittelbach et al. 2016, Tsuji and Fukami 2018). Our data do not directly inform  
334 the processes governing changes in bacterial and fungal incidence or abundance through time  
335 (Supplementary Figure S1), but they suggest that competitive interactions, together with  
336 dispersal-mediated effects could contribute to priority effects across the flowering duration of  
337 plant species and possibly through the field season. Investigating temporal patterns using more  
338 detailed microbial community or strain-level analysis, combined with better resolution of  
339 dispersal vector changes through time will better inform drivers of microbial community changes  
340 through the flowering season.

341  
342 Although the culture-dependent methods used in the current study may not be adequate to  
343 characterize all microbes possibly found in this system, work on culture-independent  
344 characterizations of multiple flowering plant species (Álvarez-Pérez et al. 2012, Fridman et al.  
345 2012, Vannette and Fukami 2017, Toju et al. 2018) suggest good correspondence between the  
346 microbial taxa detected on the media types used here and with culture-independent approaches  
347 (Morris et al. 2020). Although some colonies on YMA might be bacteria rather than fungi

348 (Dhami et al. 2018), this makes our comparisons conservative, given the possibility that some  
349 species might be detected on both media types and the lower detection threshold for colonies on  
350 YMA. In addition, our study reports a lower percentage of flower samples containing yeasts  
351 (fungi) than previous studies (Jimbo 1926, Herrera et al. 2009). A number of reasons may  
352 explain this disparity: is possible that cell density assessed microscopically may include unviable  
353 or unculturable cells, that culture methods have a higher detection threshold, or that our site has  
354 lower incidence than previously characterized sites. Our detection of bacteria yielded similar  
355 occurrence rates among flowers to previous culture-based descriptions of nectar bacteria  
356 (Álvarez-Pérez et al. 2012) despite different isolation media used.

357  
358 Taken together, the data presented here suggest that fungi are more dispersal-limited than are  
359 bacteria among flowers. Previous work suggests that different processes may influence bacterial  
360 compared to fungal dispersal, in part due to their difference in size (Qian et al. 2012). Moreover,  
361 work from vector-borne plant pathogens suggests that a combination of microbe size, vector  
362 feeding mode and vector morphology are important in determining transmission (Mitchell 2004);  
363 similar processes may influence pollinator dispersal of bacteria vs fungi. Previous work in  
364 controlled metacommunities suggest that competition-colonization dynamics between bacterial  
365 strains affect coexistence and ecosystem productivity (Livingston et al. 2012). Such dispersal-  
366 competition tradeoffs may also structure species diversity for microbial assemblages on larger  
367 geographic scales, as has recently been demonstrated for ectomycorrhizal fungi (Smith et al.  
368 2018). Our results extend this to interactions between bacteria and fungi. We suggest that further  
369 study of the consequences of variation in dispersal differences between bacterial and fungal taxa  
370 may inform the types and temporal dynamics of interactions between them, and consequences  
371 for host-microbe and multitrophic interactions in flowers.

372

### 373 **Acknowledgements**

374 We are grateful to the University of California Natural Reserve System, the Laidlaw Honey Bee  
375 Research Facility, Jeffrey Clarey and Neal Williams for site access, Amin Montazer for help  
376 with lab work, Will Jewell and Barbara Byrnes for training and technical support with MALDI-  
377 TOF, and to the Vannette lab group for providing feedback on initial drafts of this manuscript.  
378 RLV was supported by UC Davis, the Hellman Fund, the United States Department of

379 Agriculture Hatch funds multistate NE1501 and the National Science Foundation DEB  
380 #1846266.

381

382 **Data and code accessibility statement:** All data and code are available through Dryad DOI:

383 <https://doi.org/10.25338/B8403V>

384

385

386

387

388

389

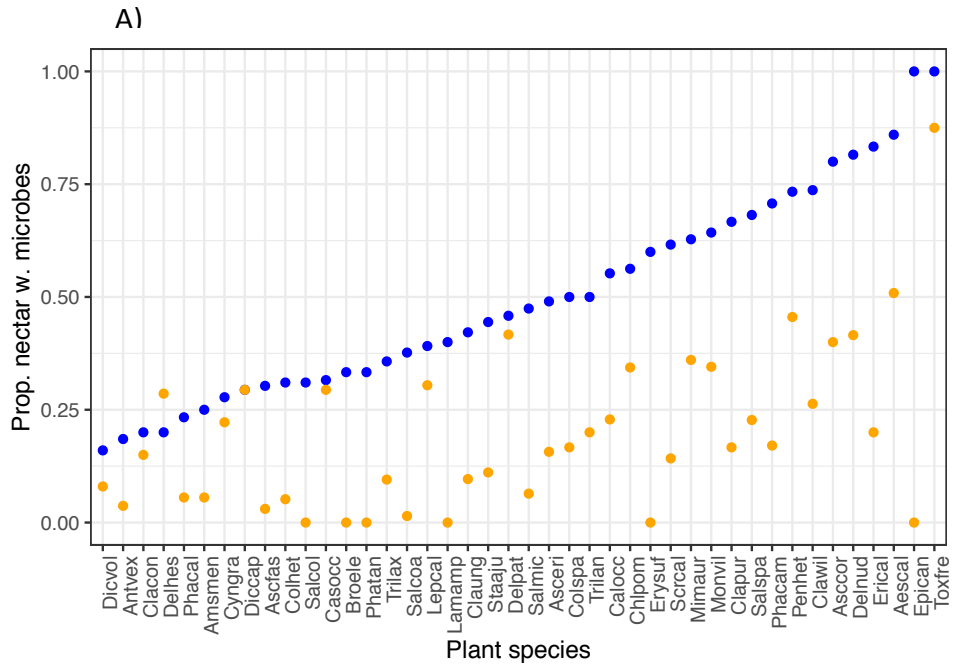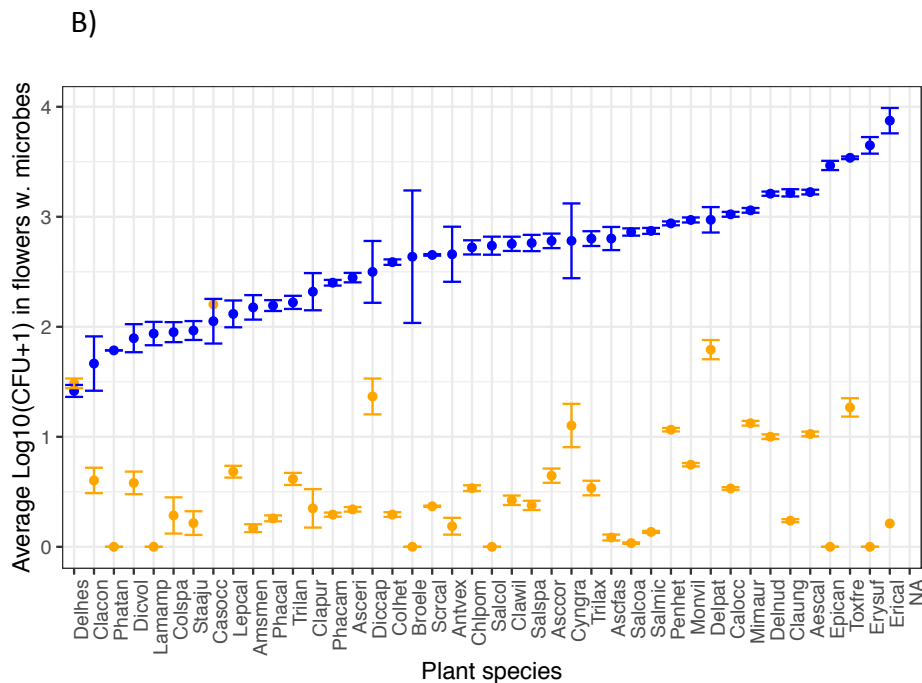

**Figure 1.** Plant species vary in a) the proportion of nectar samples containing colonies or  
 b) the average abundance of CFUs on R2A media with antifungal compound ('bacteria',  
 in blue) or colonies on YMA media with antibacterial ('fungi', in orange), ordered by  
 increasing incidence of bacteria in samples. N=6-211 per species; median=23 nectar  
 samples/species.

399  
400  
401  
402  
403  
404  
405  
406  
407  
408  
409  
410  
411  
412  
413  
414  
415  
416  
417  
418  
419  
420  
421  
422  
423  
424  
425  
426  
427  
428

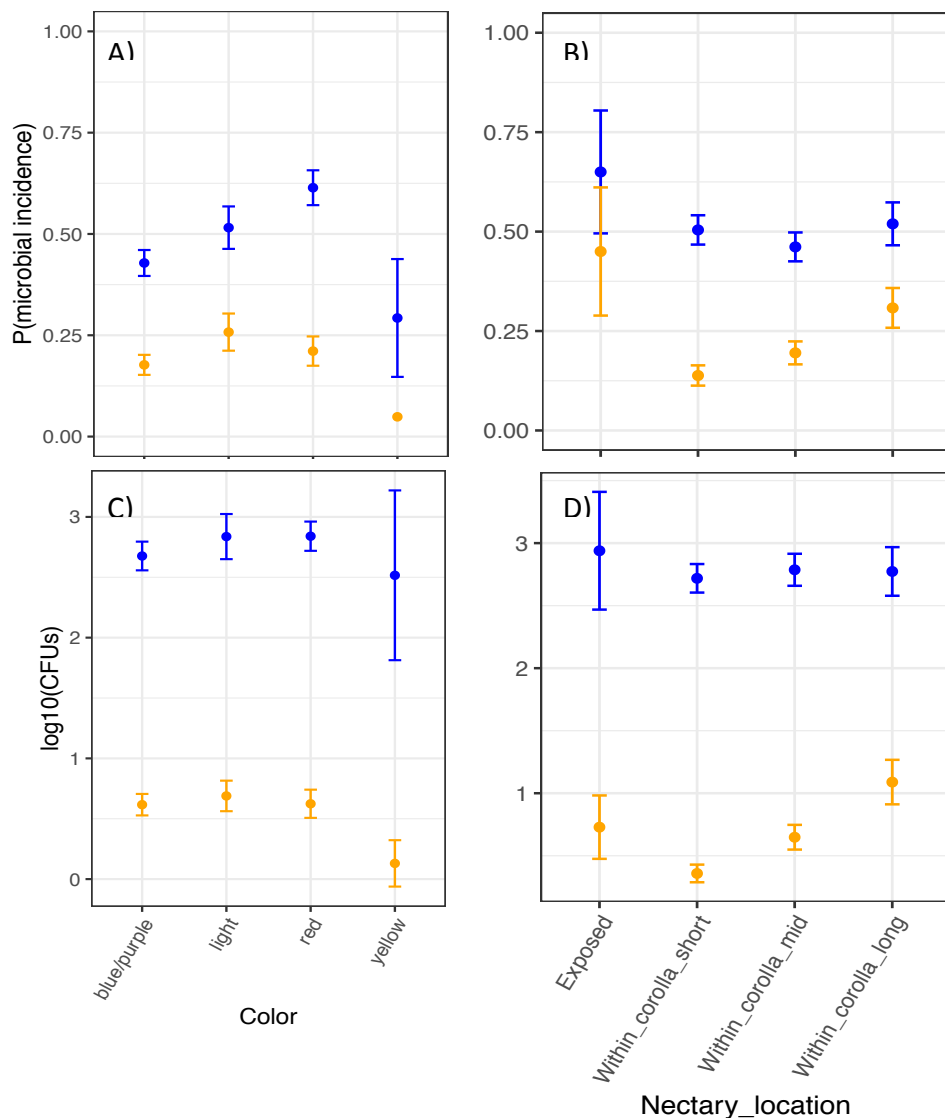

**Figure 2.** Microbial incidence and abundance in nectar varies with floral characteristics of host plant species including color (A,C) and location of the nectar (B,D). Average abundance was estimated using colony forming units counted on R2A and YMA media. Average values for bacteria are indicated in blue and fungi in orange. Microbial CFU abundance (C,D) are calculated using only those nectar samples containing detectable microbial growth, to discount variation in incidence. Points indicate value within a single nectar sample and include data from both sampling sites and years.



## 429 References

- 430 Alvarez-Pérez, S., and C. M. Herrera. 2013. Composition, richness and nonrandom assembly of  
431 culturable bacterial-microfungal communities in floral nectar of Mediterranean plants.  
432 FEMS Microbiol Ecol **83**.
- 433 Álvarez-Pérez, S., C. M. Herrera, and C. de Vega. 2012. Zooming-in on floral nectar: a first  
434 exploration of nectar-associated bacteria in wild plant communities. Fems Microbiology  
435 Ecology **80**:591-602.
- 436 Barberán, A., J. Ladau, J. W. Leff, K. S. Pollard, H. L. Menninger, R. R. Dunn, and N. Fierer. 2015.  
437 Continental-scale distributions of dust-associated bacteria and fungi. Proceedings of the  
438 National Academy of Sciences **112**:5756-5761.
- 439 Bates, D., M. Maechler, and B. Bolker. 2011. lme4: Linear mixed-effects models using S4 classes.  
440 Belisle, M., K. Peay, and T. Fukami. 2011. Flowers as Islands: Spatial Distribution of Nectar-  
441 Inhabiting Microfungi among Plants of *Mimulus aurantiacus*, a Hummingbird-Pollinated  
442 Shrub. Microbial Ecology:1-8.
- 443 Belisle, M., K. G. Peay, and T. Fukami. 2012. Flowers as islands: spatial distribution of nectar-  
444 inhabiting microfungi among plants of *Mimulus aurantiacus*, a hummingbird-pollinated  
445 shrub. Microbial Ecology **63**:711-718.
- 446 Brysch-Herzberg, M. 2004. Ecology of yeasts in plant-bumblebee mutualism in Central Europe.  
447 Fems Microbiology Ecology **50**:87-100.
- 448 Cadotte, M. W. 2006. Dispersal and species eiversity: A meta-analysis. The American Naturalist  
449 **167**:913-924.
- 450 Dhami, M. K., T. Hartwig, and T. Fukami. 2016. Genetic basis of priority effects: insights from  
451 nectar yeast. Proceedings of the Royal Society B: Biological Sciences **283**:20161455.
- 452 Dhami, M. K., T. Hartwig, A. D. Letten, M. Banf, and T. Fukami. 2018. Genomic diversity of a  
453 nectar yeast clusters into metabolically, but not geographically, distinct lineages.  
454 Molecular Ecology **27**:2067-2076.
- 455 Fridman, S., I. Izhaki, Y. Gerchman, and M. Halpern. 2012. Bacterial communities in floral  
456 nectar. Environmental Microbiology Reports **4**:97-104.
- 457 Herrera, C. M., A. Canto, M. I. Pozo, and P. Bazaga. 2010. Inhospitable sweetness: nectar  
458 filtering of pollinator-borne inocula leads to impoverished, phylogenetically clustered  
459 yeast communities. Proceedings of the Royal Society B: Biological Sciences **277**:747-754.
- 460 Herrera, C. M., C. de Vega, A. Canto, and M. I. Pozo. 2009. Yeasts in floral nectar: a quantitative  
461 survey. Annals of Botany **103**:1415-1423.
- 462 Herrera, C. M., I. M. Garcia, and R. Perez. 2008. Invisible floral larcenies: Microbial communities  
463 degrade floral nectar of bumble bee-pollinated plants. Ecology **89**:2369-2376.
- 464 Jimbo, T. 1926. Yeasts isolated from flower nectar. Sci Reports Tohoku Imp Univ **2**.
- 465 Kingston, A. B., and P. B. Mc Quillan. 2000. Are pollination syndromes useful predictors of floral  
466 visitors in Tasmania? Austral Ecology **25**:600-609.
- 467 Koskella, B., L. J. Hall, and C. J. E. Metcalf. 2017. The microbiome beyond the horizon of  
468 ecological and evolutionary theory. Nature Ecology & Evolution **1**:1606-1615.
- 469 Lachance, M. A., W. T. Starmer, C. A. Rosa, J. M. Bowles, J. S. F. Barker, and D. H. Janzen. 2001.  
470 Biogeography of the yeasts of ephemeral flowers and their insects. Fems Yeast Research  
471 **1**:1-8.

- 472 Lara, C., and J. Ornelas. 2001. Preferential nectar robbing of flowers with long corollas:  
473 experimental studies of two hummingbird species visiting three plant species. *Oecologia*  
474 **128**:263-273.
- 475 Lee, C., L. A. Tell, T. Hilfer, and R. L. Vannette. 2019. Microbial communities in hummingbird  
476 feeders are distinct from floral nectar and influenced by bird visitation. *Proceedings of*  
477 *the Royal Society B-Biological Sciences* **286**:20182295.
- 478 Leibold, M. A., M. Holyoak, N. Mouquet, P. Amarasekare, J. Chase, M. Hoopes, R. Holt, J. Shurin,  
479 R. Law, and D. Tilman. 2004. The metacommunity concept: a framework for multi-scale  
480 community ecology. *Ecology Letters* **7**:601-613.
- 481 Livingston, G., M. Matias, V. Calcagno, C. Barbera, M. Combe, M. A. Leibold, and N. Mouquet.  
482 2012. Competition–colonization dynamics in experimental bacterial metacommunities.  
483 *Nature Communications* **3**:1-8.
- 484 Mitchell, P. L. 2004. Heteroptera as vectors of plant pathogens. *Neotropical Entomology*  
485 **33**:519-545.
- 486 Mittelbach, M., A. M. Yurkov, R. Stoll, and D. Begerow. 2016. Inoculation order of nectar-borne  
487 yeasts opens a door for transient species and changes nectar rewarded to pollinators.  
488 *Fungal Ecology*.
- 489 Morris, M., N. Frixione, A. Burkert, E. Dinsdale, and R. L. Vannette. 2020. Microbial abundance,  
490 composition, and function in nectar are shaped by flower visitor identity. *FEMS*  
491 *Microbiol Ecol* **96**:3.
- 492 Peay, K. G., M. G. Schubert, N. H. Nguyen, and T. D. Bruns. 2012. Measuring ectomycorrhizal  
493 fungal dispersal: macroecological patterns driven by microscopic propagules. *Molecular*  
494 *Ecology* **21**:4122-4136.
- 495 Plowright, R. 1987. Corolla depth and nectar concentration: an experimental study. *Canadian*  
496 *Journal of Botany* **65**:1011-1013.
- 497 Pozo, M. I., M.-A. Lachance, and C. M. Herrera. 2012a. Nectar yeasts of two southern Spanish  
498 plants: the roles of immigration and physiological traits in community assembly. *Fems*  
499 *Microbiology Ecology* **80**:281-293.
- 500 Pozo, M. J., M.-A. Lachance, and C. M. Herrera. 2012b. Nectar yeasts of two southern Spanish  
501 plants: the roles of immigration and physiological traits in community assembly. *FEMS*  
502 *Microbiol Ecol* **80**.
- 503 Qian, J., D. Hospodsky, N. Yamamoto, W. W. Nazaroff, and J. Peccia. 2012. Size-resolved  
504 emission rates of airborne bacteria and fungi in an occupied classroom. *Indoor air*  
505 **22**:339-351.
- 506 Smith, G. R., B. S. Steidinger, T. D. Bruns, and K. G. Peay. 2018. Competition–colonization  
507 tradeoffs structure fungal diversity. *The ISME journal* **12**:1758-1767.
- 508 Toju, H., R. L. Vannette, M. P. L. Gauthier, M. K. Dhama, and T. Fukami. 2018. Priority effects can  
509 persist across floral generations in nectar microbial metacommunities. *Oikos* **127**:345-  
510 352.
- 511 Tsuji, K., and T. Fukami. 2018. Community-wide consequences of sexual dimorphism: evidence  
512 from nectar microbes in dioecious plants. *Ecology* **99**:2476-2484.
- 513 Tucker, C. M., and T. Fukami. 2014. Environmental variability counteracts priority effects to  
514 facilitate species coexistence: evidence from nectar microbes. *Proceedings of the Royal*  
515 *Society of London B: Biological Sciences* **281**:20132637.

- 516 Vannette, R. L., and T. Fukami. 2017. Dispersal enhances beta diversity in nectar microbes.  
517 Ecology Letters.
- 518 von Arx, M., A. Moore, G. Davidowitz, and A. E. Arnold. 2019. Diversity and distribution of  
519 microbial communities in floral nectar of two night-blooming plants of the Sonoran  
520 Desert. Plos One **14**.
- 521
